# Supplementary material for: Sn(IV)-Porphyrin-Based Nanostructures Featuring Pd(II)-Mediated Supramolecular Arrays and Their Photocatalytic Degradation of Acid Orange 7 Dye
Source: MDPI journal article supplement (doi:10.3390/ijms232213702), 2022-11-08
Supplement: s1 [file s1]

## **Supplementary Materials**

# **Sn(IV)-Porphyrin-Based Nanostructures Featuring Pd(II)-Mediated Supramolecular Arrays and Their Photocatalytic Degradation of Acid Orange 7 Dye**

Nirmal Kumar Shee and Hee-Joon Kim\*

*Department of Chemistry and Bioscience, Kumoh National Institute of Technology  
61 Daehak-ro, Gumi 39177, Republic of Korea*

## List of contents:

**Figure S1.** The  $^1\text{H}$  NMR spectrum of  $\{(\text{trans-dihydroxo})[5,10\text{-bis(4-pyridyl)-15,20-bis(phenyl)porphyrinato}]\}\text{tin(IV)}$  (**SnP<sup>1</sup>**) in  $\text{CDCl}_3$ .

**Figure S2.** The  $^1\text{H}$  NMR spectrum of  $\{(\text{trans-diisonicotinato})[5,10\text{-bis(4-pyridyl)-15,20-bis(phenyl)porphyrinato}]\}\text{tin(IV)}$  (**SnP<sup>2</sup>**) in  $\text{CDCl}_3$ .

**Figure S3.** The  $^1\text{H}$  NMR spectrum of array **1** in  $\text{CDCl}_3$ .

**Figure S4.** The  $^1\text{H}$  NMR spectrum of array **2** in  $\text{CDCl}_3$ , which was measured after the addition of 2 equiv. of  $\text{trans-Pd(PhCN)}_2\text{Cl}_2$  into the **SnP<sup>2</sup>** solution of  $2.0 \times 10^{-6}$  M.

**Figure S5.** The electrospray ionization mass (ESI-MS) spectrum of **SnP<sup>1</sup>**.

**Figure S6.** The ESI-MS spectrum of **SnP<sup>2</sup>**.

**Figure S7.** The ESI-MS spectrum of **1**.

**Figure S8.** The FTIR spectra of **1** and **2** along with **SnP<sup>1</sup>** and **SnP<sup>2</sup>**.

**Figure S9.** The thermogravimetric analysis (TGA) curves of **1** and **2**.

**Figure S10.** The powder X-ray diffraction (PXRD) patterns of **1** and **2**.

**Figure S11.** The adsorption and desorption isotherms of  $\text{N}_2$  for **1**, **2**, and **3** at 77 K.

**Figure S12.** Particle size determination by dynamic light scattering (DLS) for **1** and **2** in THF.

**Figure S13.** The field emission scanning electron microscopy (FE-SEM) images of **SnP<sup>1</sup>** (a) and **SnP<sup>2</sup>** (b).

**Figure S14.** The adsorption of AO on **1**, **2**, and **3**.

**Figure S15.** The time-dependent absorption spectra of AO in the presence of **2** under visible-light irradiation.

**Figure S16.** The kinetics of the photocatalytic degradation of AO under visible-light irradiation by photocatalysts **1**, **2**, and **3**.

**Figure S17.** The typical catalytic cycles (up to 10 consecutive cycles) of photocatalyst **2** for the degradation of AO.

**Figure S18.** The powder X-ray diffraction (PXRD) patterns of **1** and **2** after use for photocatalytic degradation of AO.

**Figure S19.** The typical FE-SEM image of photocatalyst **1** and **2** after the degradation of AO.

**Figure S20.** The effect of temperature on the degradation of AO by **2**.

**Figure S21.** The effect of pH of the AO solution for photodegradation by **2**.

**Figure S22.** The effect of the AO concentration on the photodegradation by **2** (10 mg).

**Figure S23.** The effect of various scavengers for the degradation of AO in the presence of **2** under visible-light irradiation ( $[p\text{-BQ}]_0 = [\text{tBuOH}]_0 = 5 \text{ mM}$ , pH 7.0,  $T = 298 \text{ K}$ ). **SnP**<sup>1</sup> and **SnP**<sup>2</sup> were used as catalysts for comparison.

**Figure S24.** The photocatalytic activities of **2** at different wavelengths for the degradation of AO.

**Figure S25.** The ESI-MS spectrum (negative ion mode) of the reaction mixture of AO in the presence of **2** after 30 min of visible-light irradiation.

**Table S1.** Degraded products from the photodegradation of AO identified by ESI-MS.

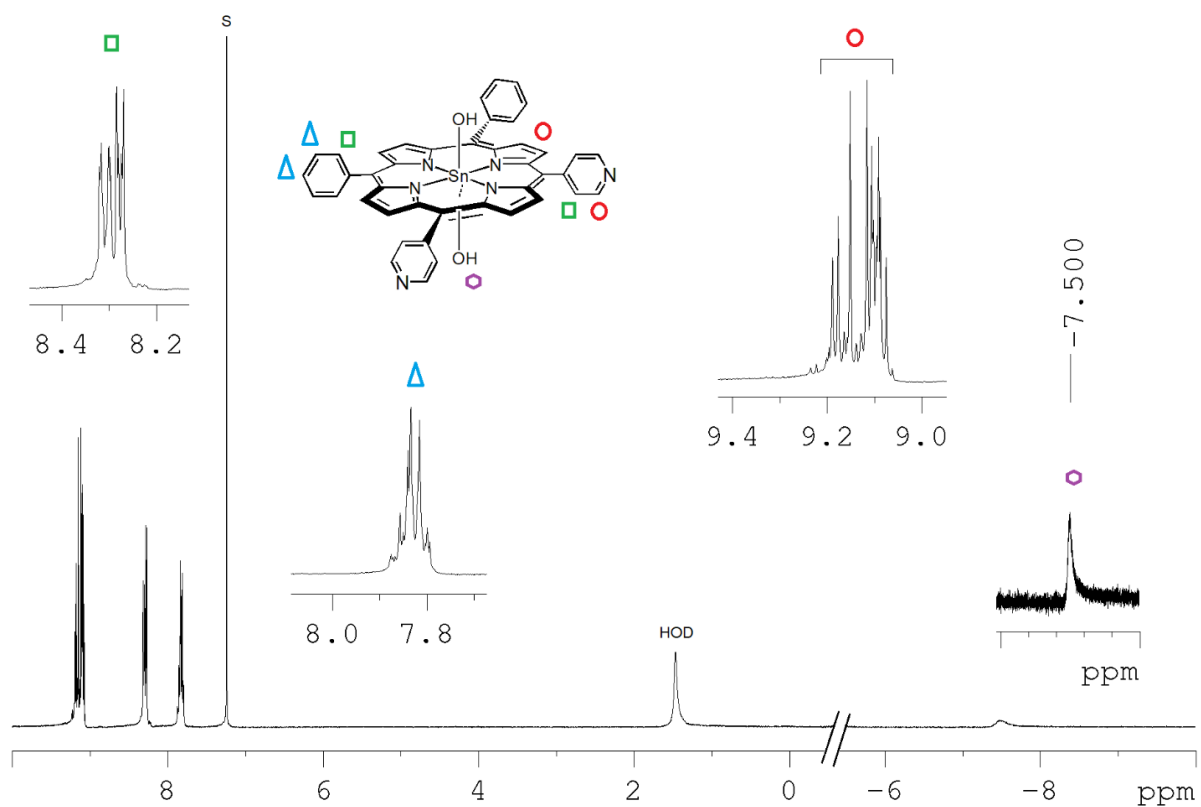

**Figure S1.** The  $^1\text{H}$  NMR spectrum of  $\{(trans\text{-dihydroxo})[5,10\text{-bis}(4\text{-pyridyl})\text{-}15,20\text{-bis}(\text{phenyl})\text{porphyrinato}]\}\text{tin(IV)}$  (**SnP<sup>1</sup>**) in  $\text{CDCl}_3$ .

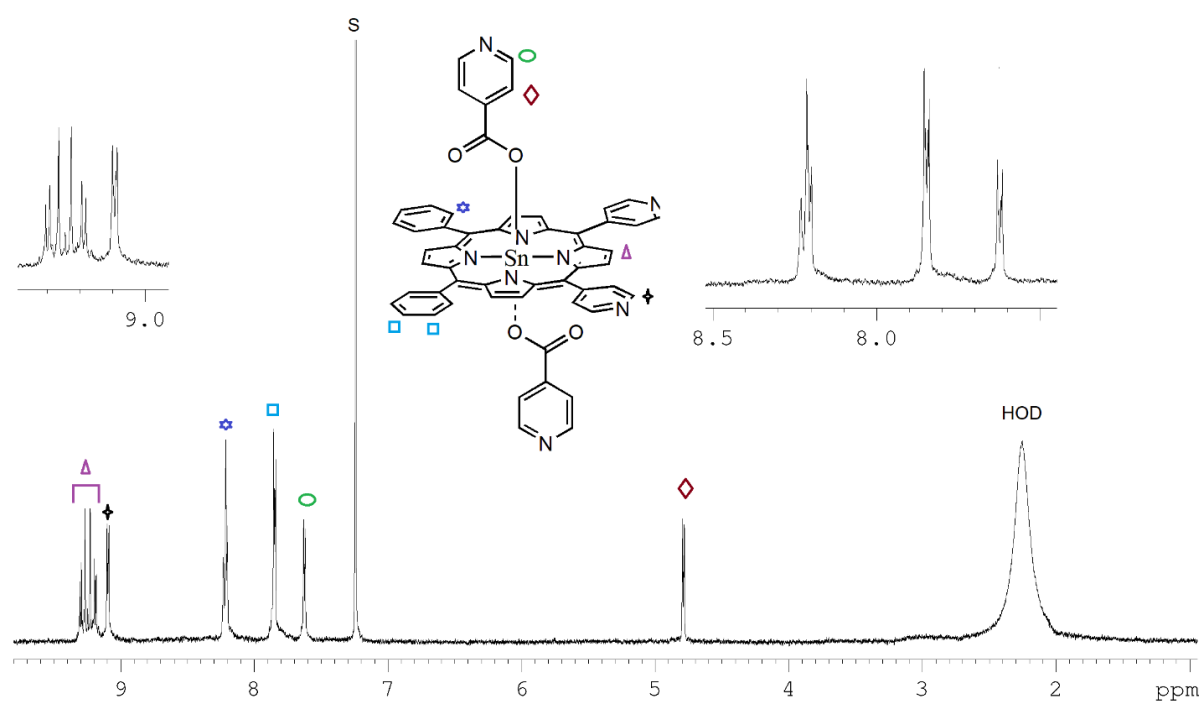

**Figure S2.** The  $^1\text{H}$  NMR spectrum of  $\{(trans\text{-}diisonicotinato)[5,10\text{-}bis(4\text{-}pyridyl)\text{-}15,20\text{-}bis(phenyl)porphyrinato]\}tin(IV)$  ( $\text{SnP}^2$ ) in  $\text{CDCl}_3$ .

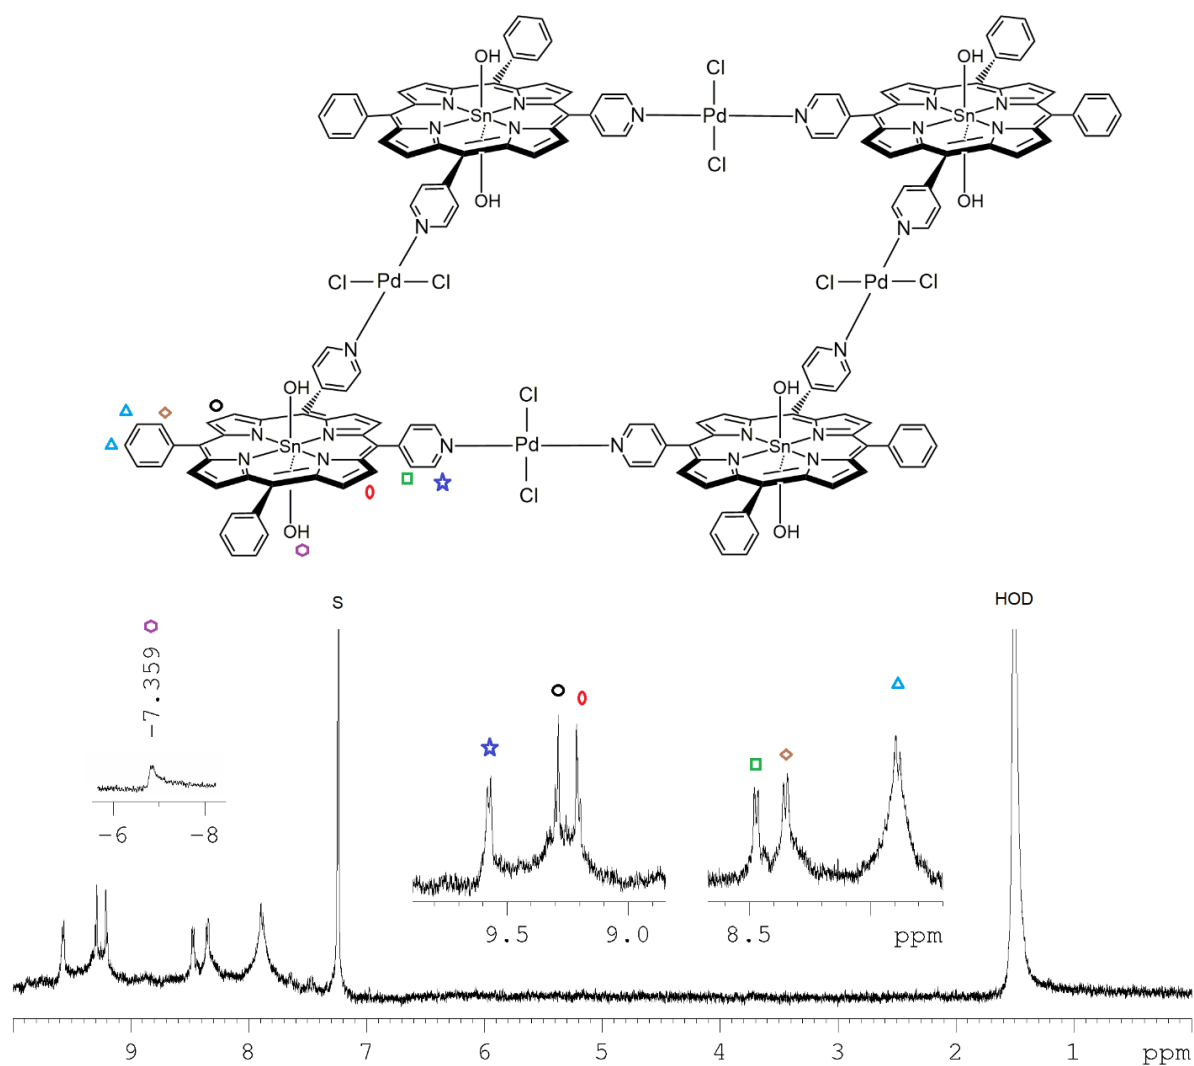

**Figure S3.** The  $^1\text{H}$  NMR spectrum of array **1** in  $\text{CDCl}_3$ .

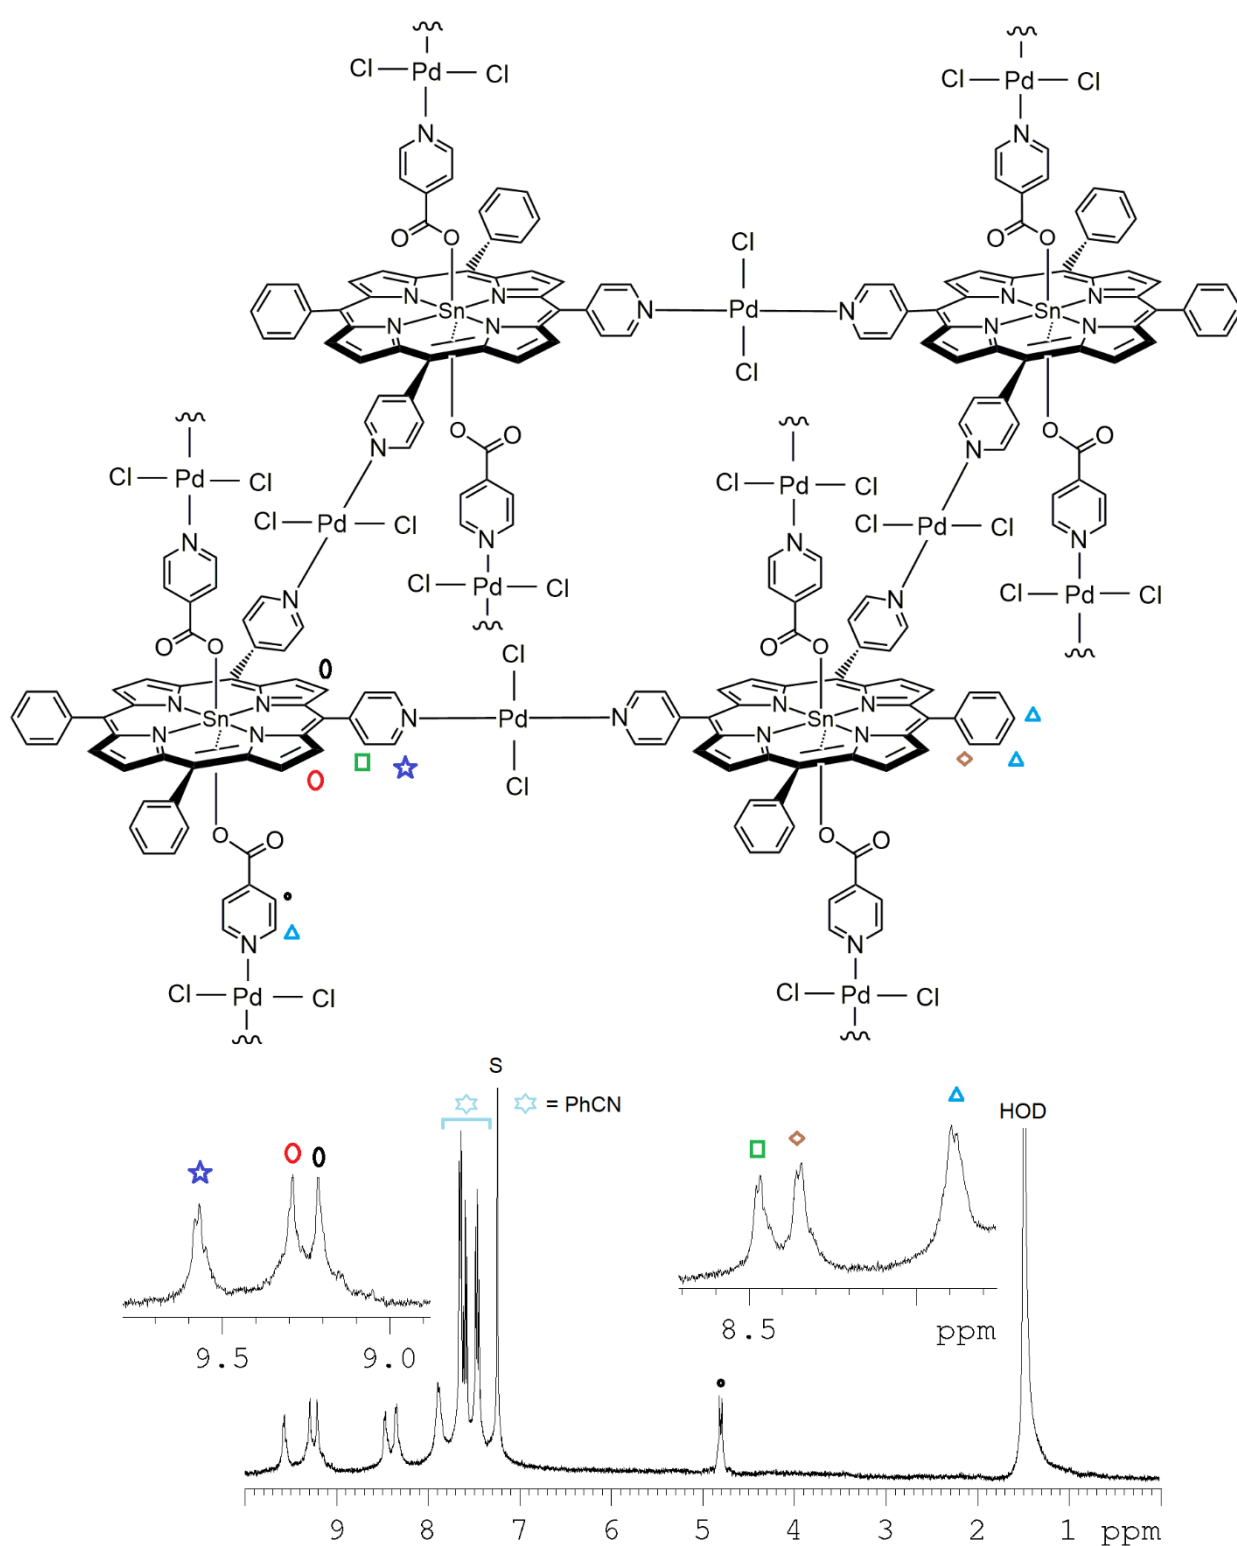

**Figure S4.** The  $^1\text{H}$  NMR spectrum of array 2 in  $\text{CDCl}_3$ , which was measured after the addition of 2 equiv. of  $\text{trans-Pd(PhCN)}_2\text{Cl}_2$  into the **SnP2** solution of  $2.0 \times 10^{-6}$  M.

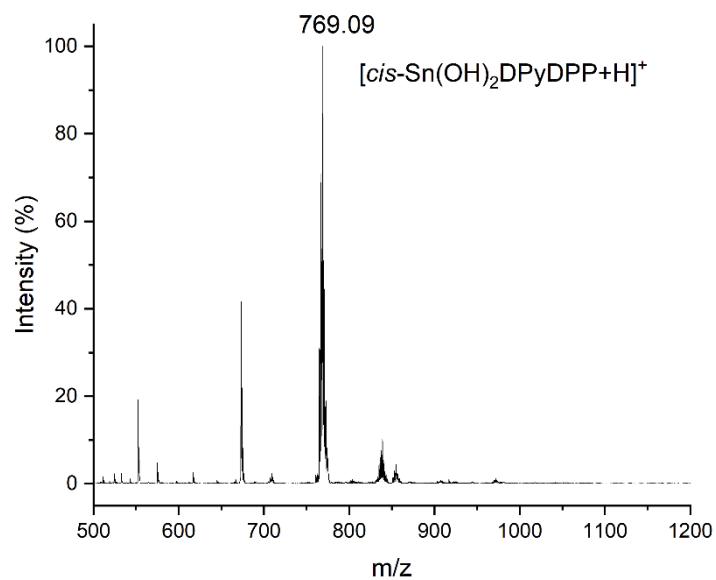

**Figure S5.** The electrospray ionization mass (ESI-MS) spectrum of **SnP<sup>1</sup>**.

---

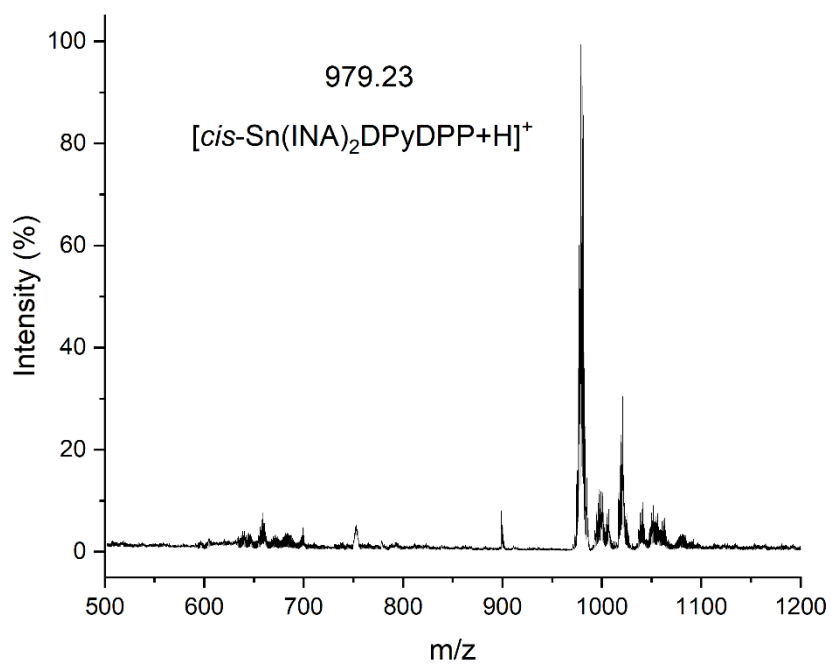

**Figure S6.** The ESI-MS spectrum of **SnP<sup>2</sup>**.

---



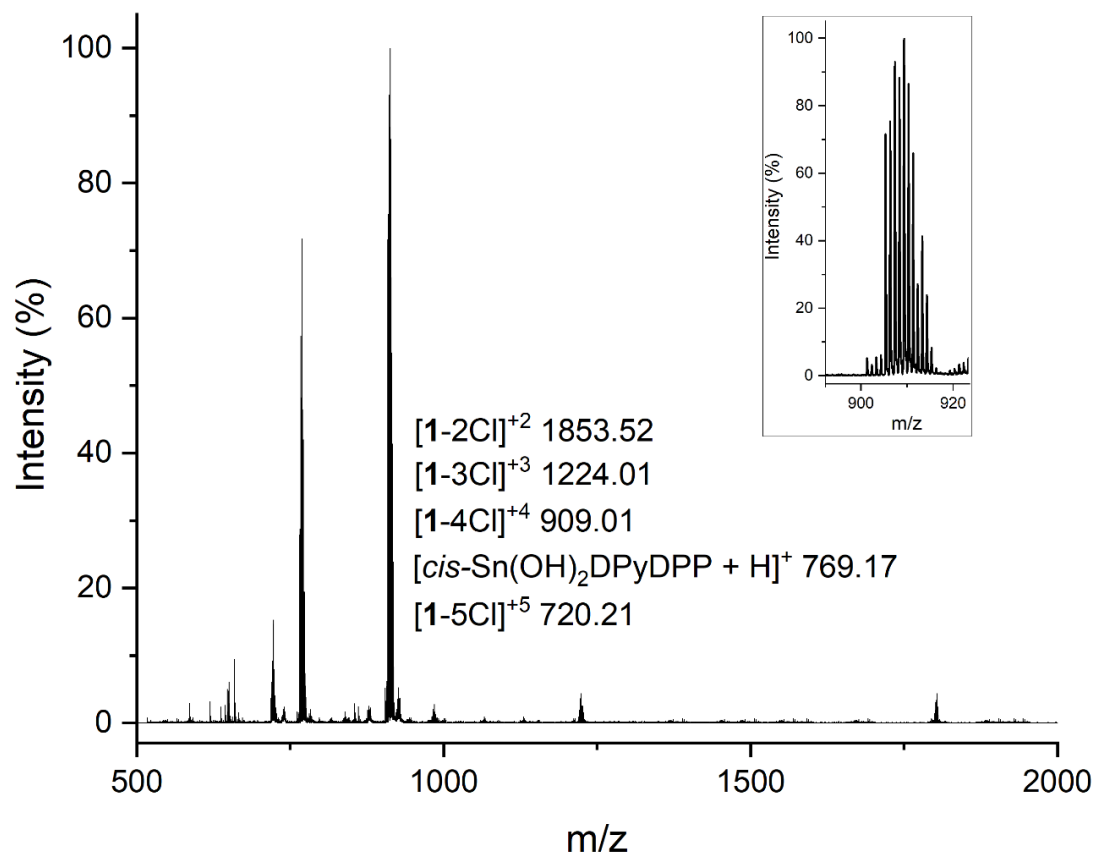

**Figure S7.** The ESI-MS spectrum of **1**.

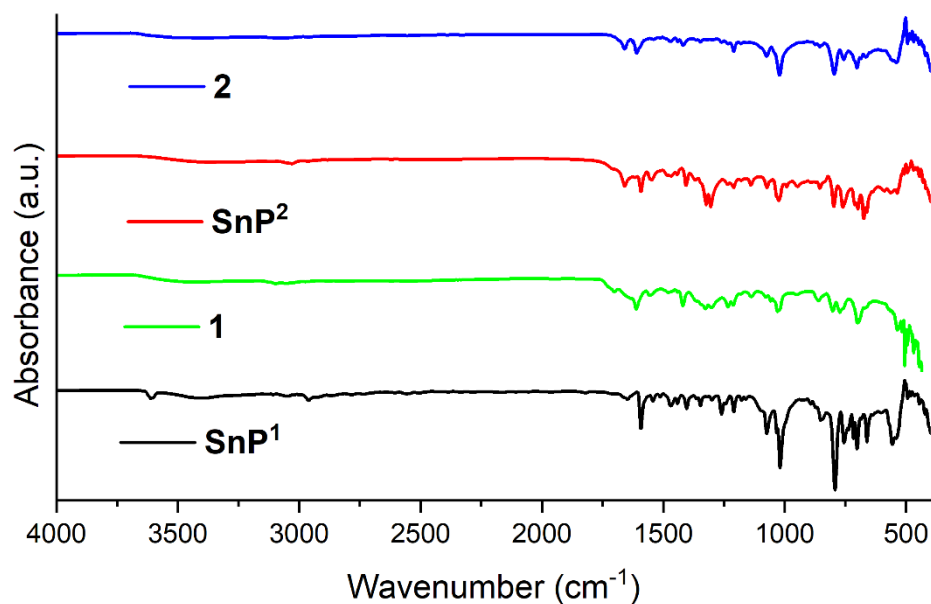

**Figure S8.** The FT-IR spectra of **1** and **2** along with **SnP<sup>1</sup>** and **SnP<sup>2</sup>**.

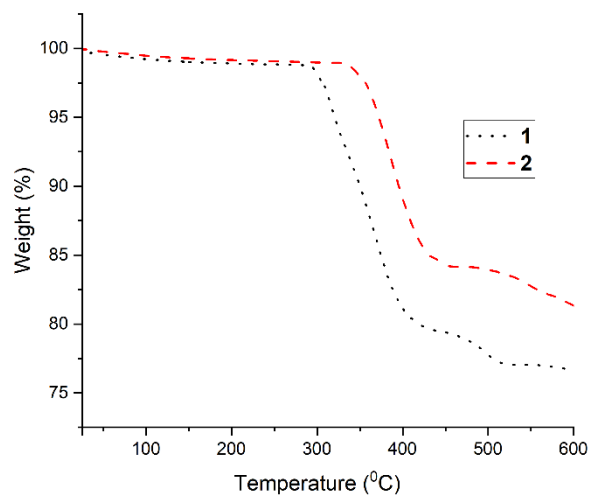

**Figure S9.** The thermogravimetric analysis (TGA) curves of **1** and **2**.

---

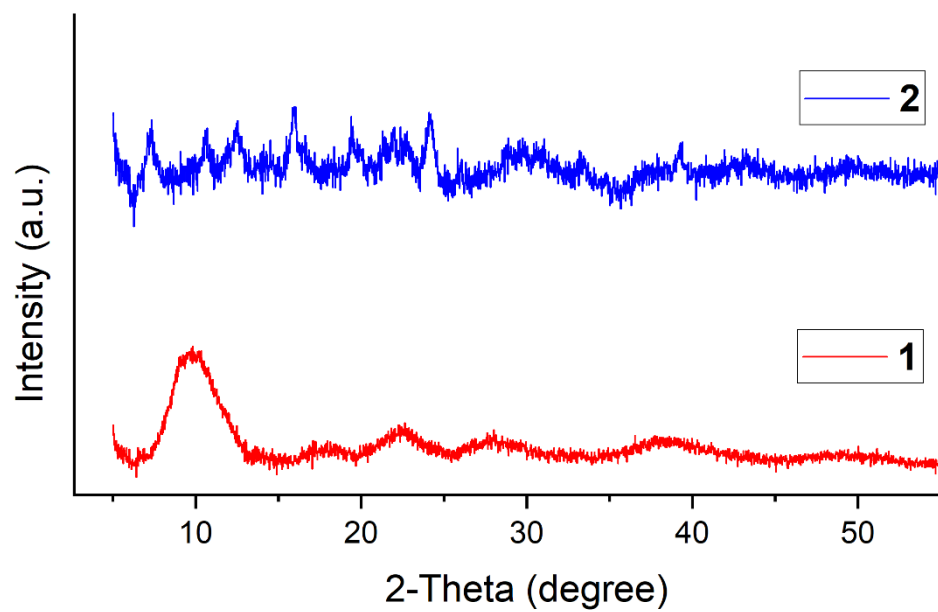

**Figure S10.** The powder X-ray diffraction (PXRD) patterns of **1** and **2**.

---

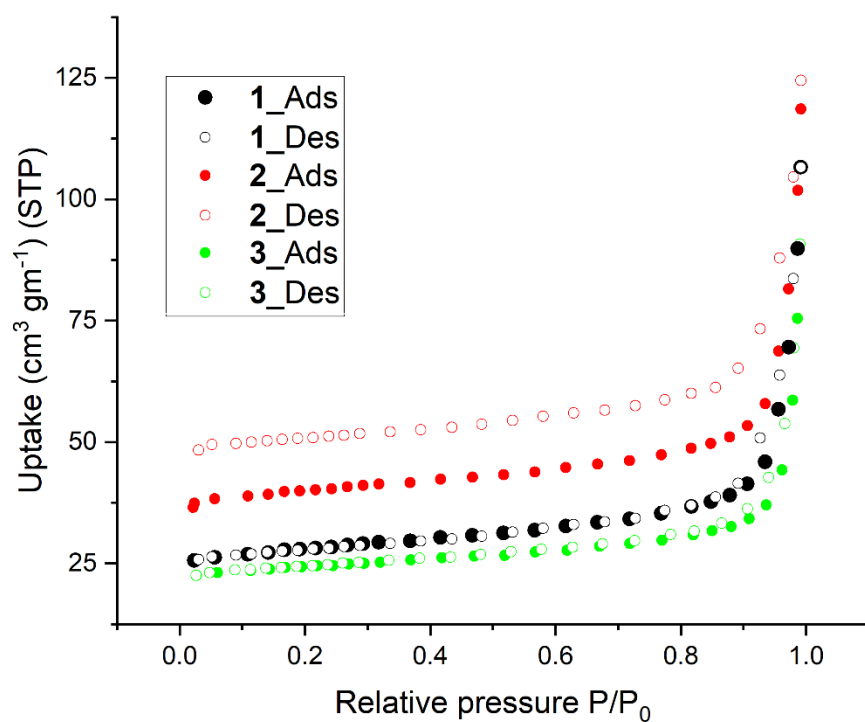

**Figure S11.** The adsorption and desorption isotherms of N<sub>2</sub> for **1**, **2**, and **3** at 77 K.

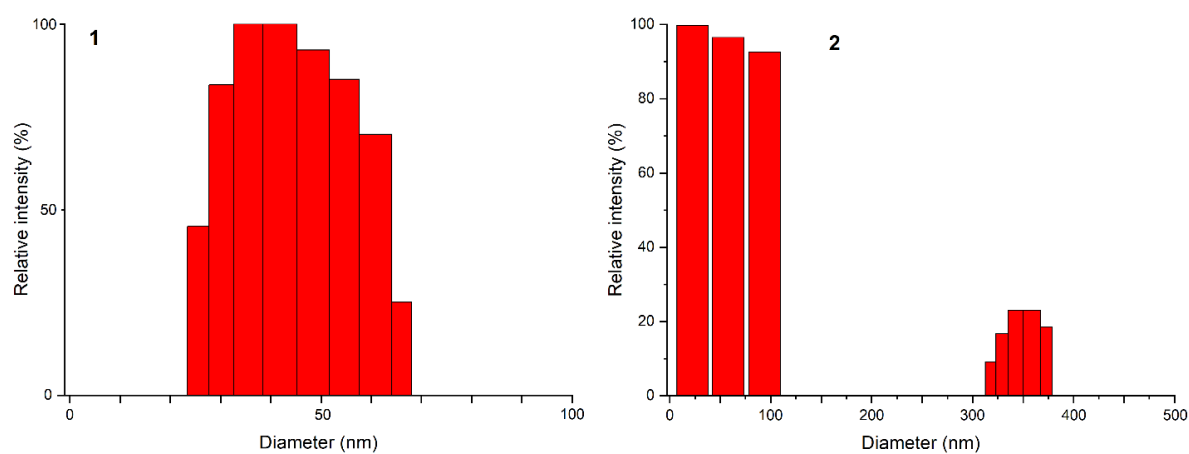

**Figure S12.** The particle size determination by dynamic light scattering (DLS) of **1** and **2** in THF.

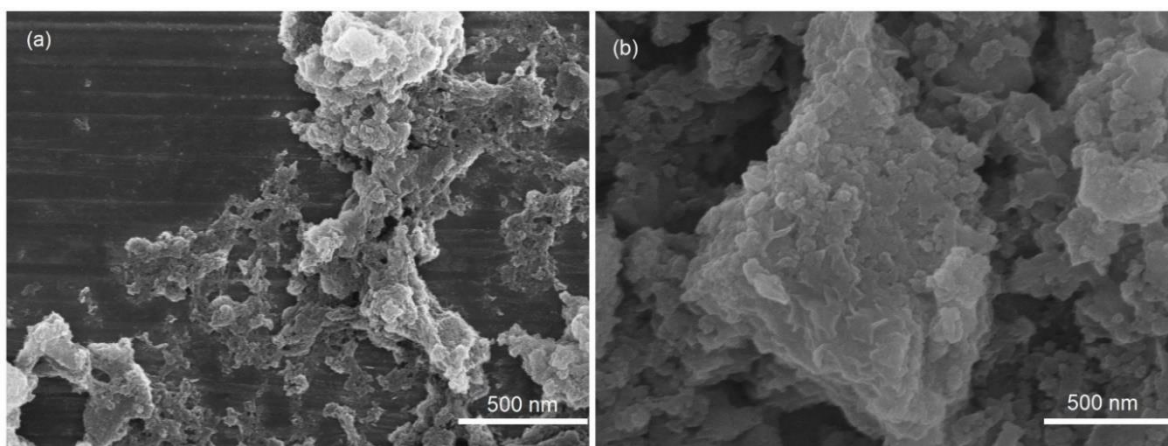

**Figure S13.** The field emission scanning electron microscopy (FESEM) images of **SnP<sup>1</sup>** (a) and **SnP<sup>2</sup>** (b).

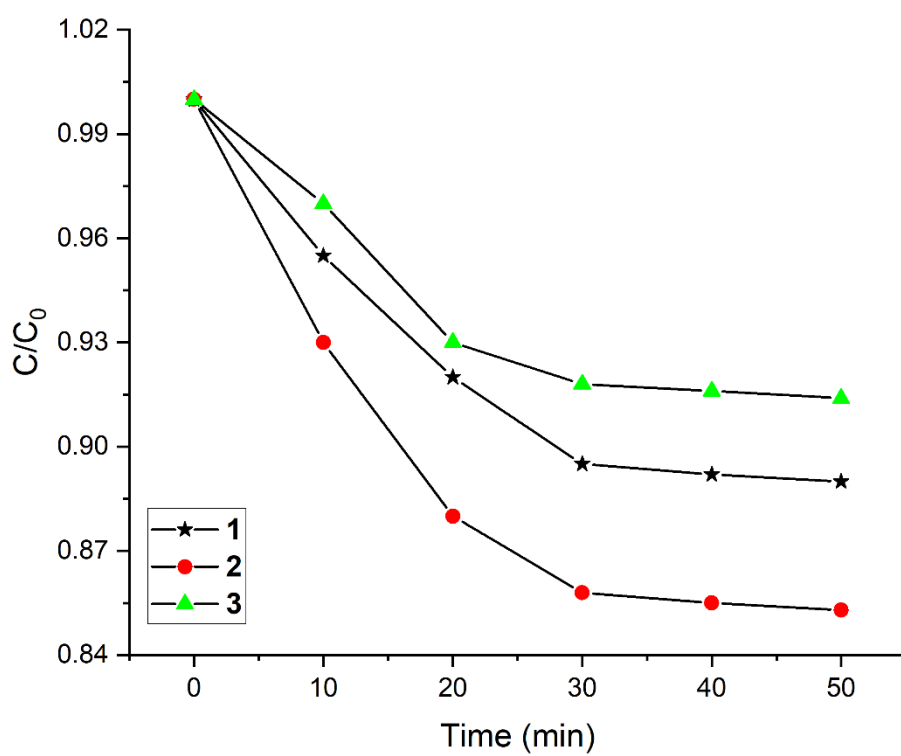

**Figure S14.** The adsorption of AO on **1**, **2**, and **3**.

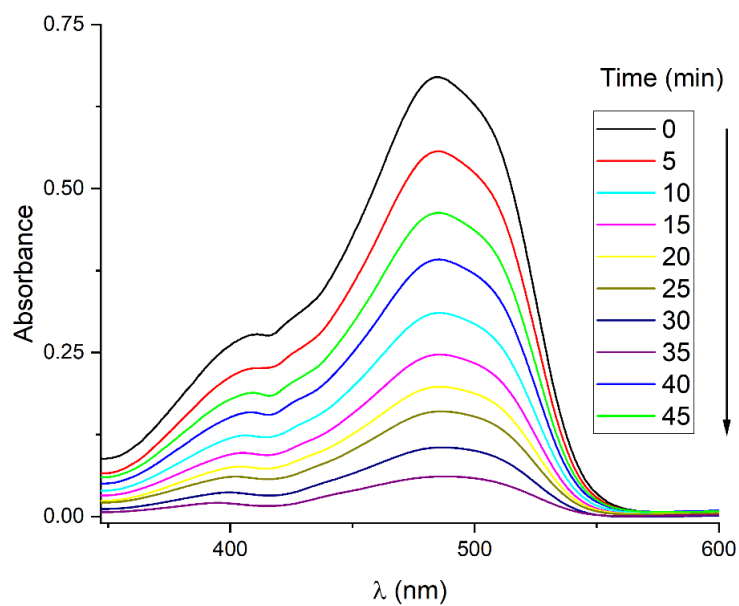

**Figure S15.** The time-dependent absorption spectra of AO in the presence of **2** under visible-light irradiation.

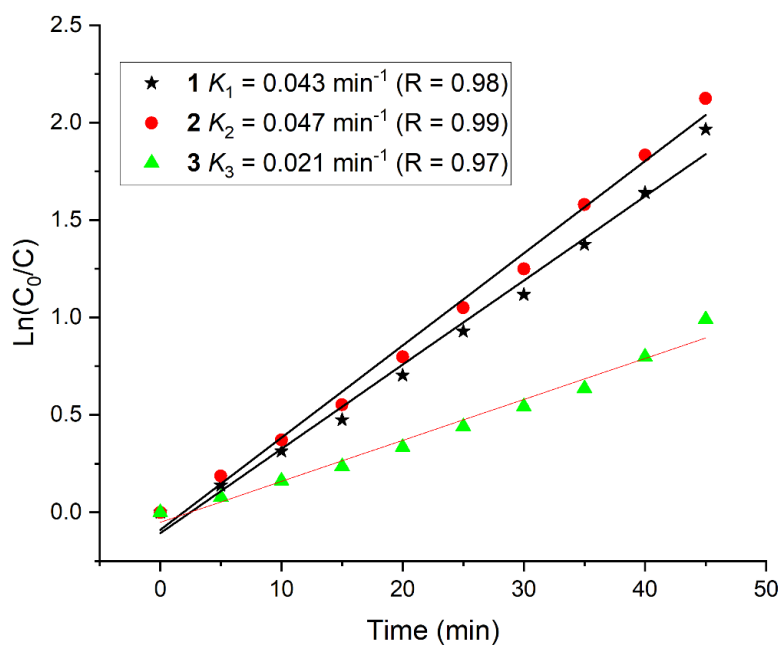

**Figure S16.** The kinetics of the photocatalytic degradation of AO under visible-light irradiation by **1**, **2**, and **3**.

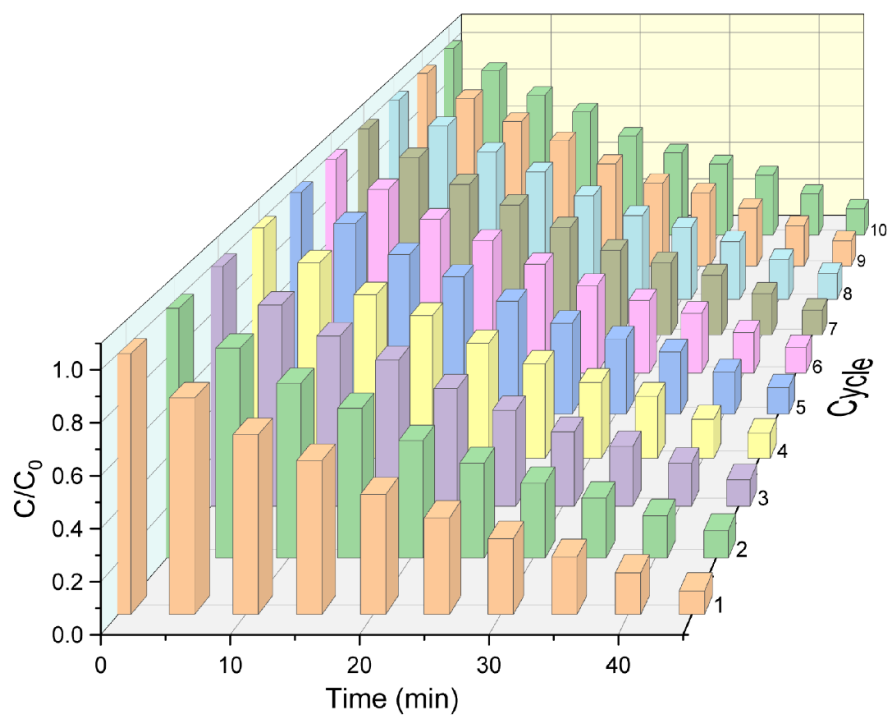

**Figure S17.** The typical catalytic cycles (up to 10 consecutive cycles) of **2** for the degradation of AO.

---

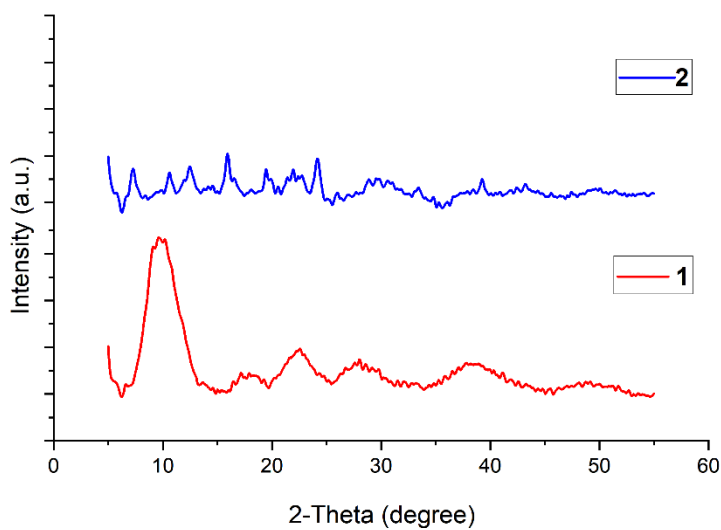

**Figure S18.** The PXRD patterns of **1** and **2** after use for photocatalytic degradation of AO.

---

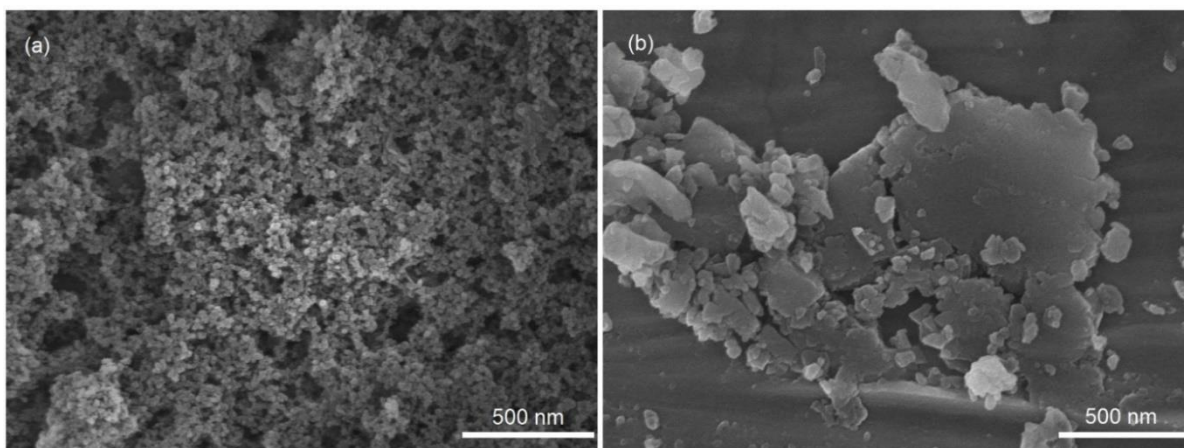

**Figure S19.** The FESEM image of photocatalyst **1** and **2** after AO degradation.

---

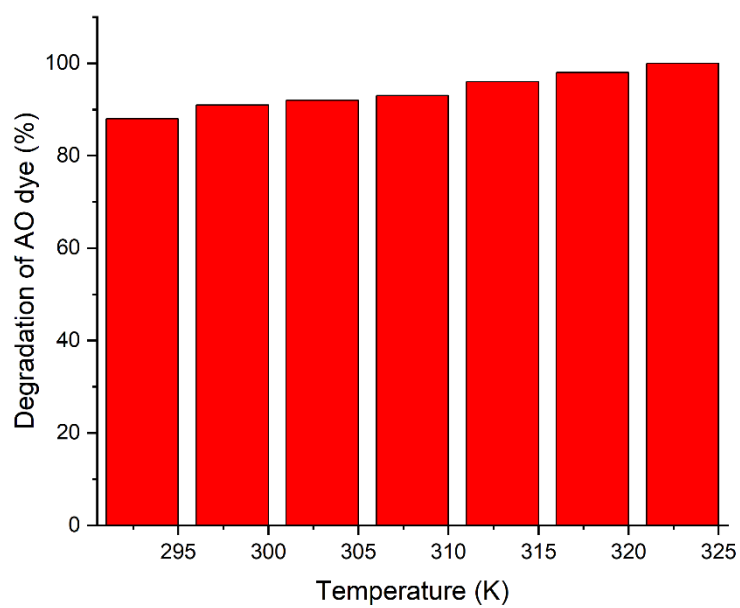

**Figure S20.** The effect of temperature on AO degradation by **2**.

---

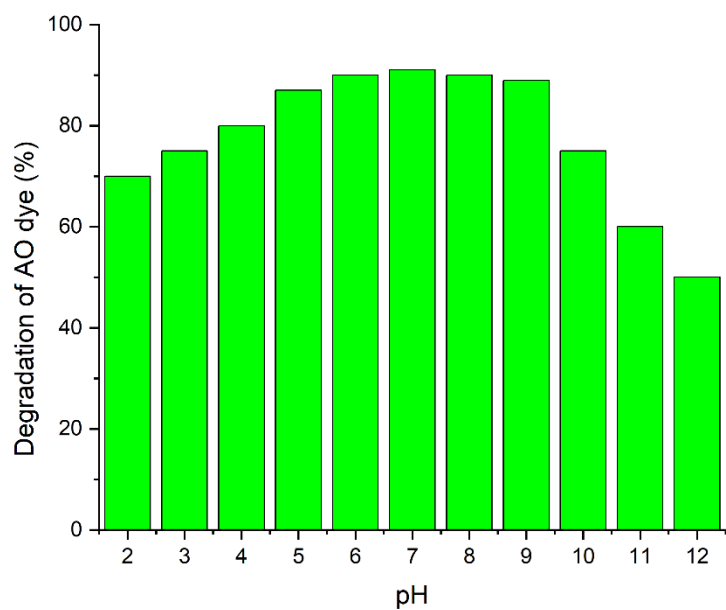

**Figure S21.** The effect of pH of the AO solution on photodegradation by **2**.

---

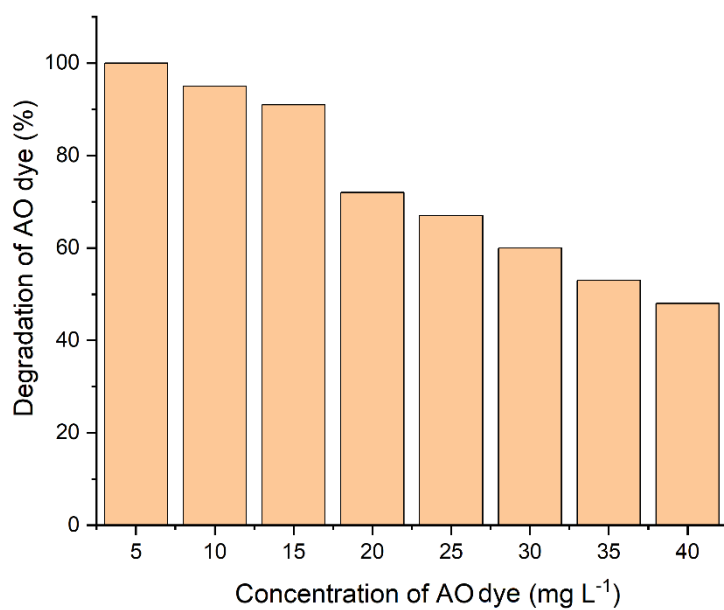

**Figure S22.** The effect of the AO concentration on photodegradation by **2** (10 mg).

---



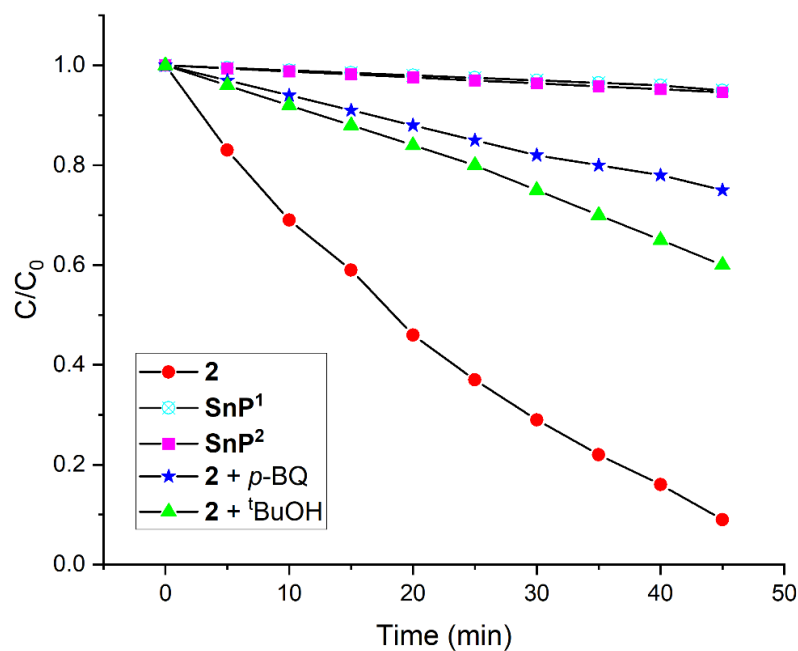

**Figure S23.** The effect of various scavengers for AO degradation by **2** under visible-light irradiation ( $[p\text{-BQ}]_0 = [t\text{BuOH}]_0 = 5 \text{ mM}$ , pH 7.0,  $T = 298 \text{ K}$ ). **SnP¹** and **SnP²** were used as catalysts for comparison.

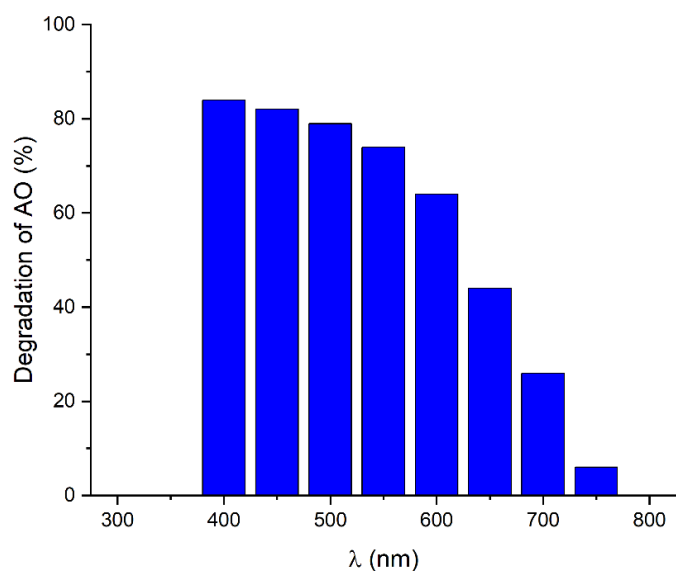

**Figure S24.** The photocatalytic activities of **2** at different wavelengths for the degradation of AO.

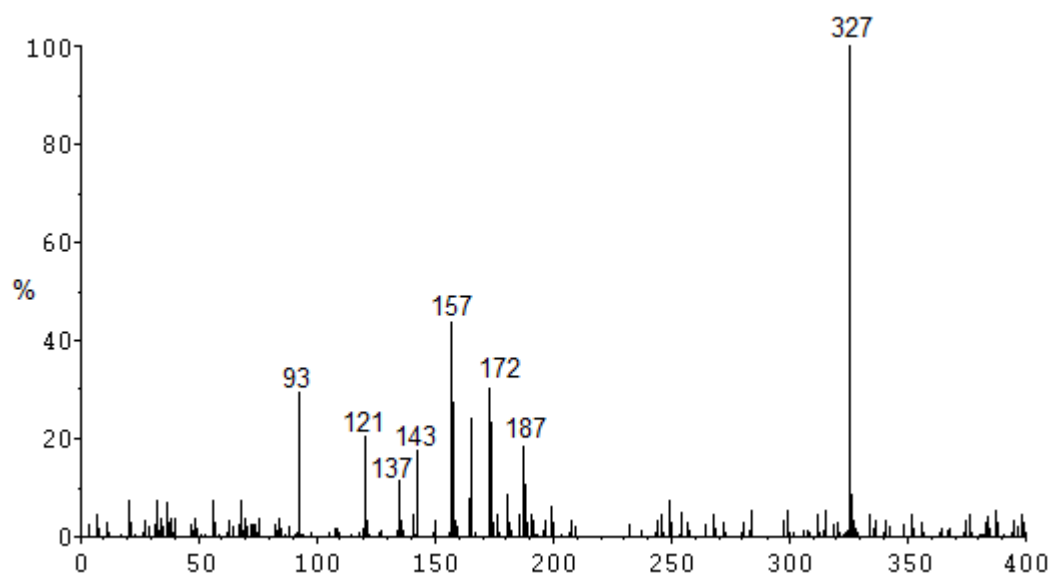

**Figure S25.** The ESI-MS spectrum (negative ion mode) of the reaction mixture AO by **2** after 30 min of visible-light irradiation.

---

**Table S1.** Degraded products from the photodegradation of AO identified by ESI-MS.

| Products | m/z measured | Relative abundance (%) | Proposed structure                                                                   |
|----------|--------------|------------------------|--------------------------------------------------------------------------------------|
| P1       | 327.34       | 100                    | 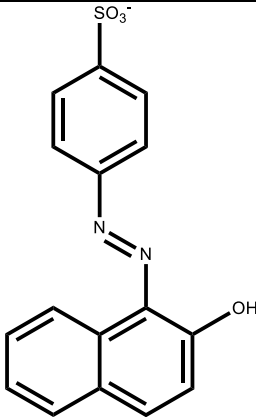   |
| P2       | 187.20       | 18                     |   |
| P3       | 172.18       | 30                     |  |
| P4       | 157.17       | 43                     |  |
| P5       | 143.16       | 19                     |  |

|    |        |    |                                                                                    |
|----|--------|----|------------------------------------------------------------------------------------|
| P6 | 137.11 | 17 | 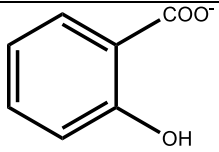 |
| P7 | 121.11 | 20 |  |
| P8 | 93.10  | 29 |  |
